# Supplementary material
Source: publisher figshare collection journal article supplement (https://karger.figshare.com/ndownloader/files/38310768)
Supplement: Supplementary file 1 [file 38310768]

Supplement Table IV. Characteristics of patients with AKI who died during hospital stay

|  | **Died in hospital** | **Survived** | *p* |
| --- | --- | --- | --- |
| N (%) | N (%) | Chi-2 |
| No of patients | 57 (4) | 1235 (96) | NS |
| Female sex | 20 (35) | 505 (41) | NS |
| Male sex | 37 (65) | 730 (59) | NS |
| Prerenal AKI | 27 (47) | 568 (46) | NS |
| Renal AKI | 3 (5) | 119 (10) | NS |
| Postrenal AKI | 1 (2) | 109 (9) | NS |
| AKI on CKD | 26 (46) | 439 (36) | NS |
| AKI stage 1 | 14 (25) | 223 (18) | NS |
| AKI stage 2 | 5 (9) | 166 (13) | NS |
| AKI stage 3 | 38 (67) | 846 (69) | NS |
|  | | |  |
|  | Mean (SD) | Mean (SD) | t-test |
| Age (years) | 81 (8.4) | 72 (16) | <0.001 |
| Previous sCr (µmol/l) | 160 (89) | 134 (87) | <0.05 |
| sCr admission (µmol/l) | 461 (347) | 412 (299) | NS |
| Systolic BP (mmHg) | 114 (25) | 131 (25) | <0.001 |
| Diastolic BP (mmHg) | 66 (15) | 74 (14) | <0.001 |
| BMI (kg/m2) | 27 (7.9) | 26 (5.9) | NS |
| Hemoglobin (g/l) | 110 (21) | 117 (23) | <0.05 |
| Leukocyte count (x109/l) | 11.3 (4.4) | 11.1 (8.9) | NS |
| Albumin (g/l) | 25 (6.4) | 30 (6.4) | <0.001 |
| Potassium (mmol/l) | 4.6 (0.8) | 4.5 (0.9) | NS |
| St bicarbonate (mmol/l) | 19 (4.8) | 21 (4.1) | 0.002 |
|  | | |  |
|  | Median (IQR) | Median (IQR) | Mann Whitney |
| CRP (mg/l) | 55 (27-124) | 35 (9-120) | NS |
| ACR (mg/mmol) | 15.2 (4.3-92.6) | 13.0 (3.9-47.1) | 0.011 |
|  | | | |
|  | N (%) | N (%) | Chi-2/Fisher |
| Albumin <35 g/l | 51 (93) | 1001 (82) | <0.05 |
| St bicarbonate <22 mmol/l | 36 (74) | 658 (55) | 0.012 |
| Criteria 0* | 1 (2.0) | 66 (5.7) | <0.001f |
| 1 criterion | 5 (10) | 233 (20) |
| 2 criteria | 12 (25) | 503 (43) |
| 3 criteria¶ | 31 (63) | 360 (31) |

* * Number of criteria fulfilled. 0=no hypoalbuminemia. no acidosis and no inflammation.

¶ All three criteria. Patients with both hypoalbuminemia (<35 g/l), acidosis (standard bicarbonate <22 mmol/l) and inflammation (CRP>20 mg/l)

f Fishers exact test
